# Supplementary material for: Evaluation of DFO-HOPO as an octadentate chelator for zirconium-89
Source: Royal Society of Chemistry journal article supplement (doi:10.1039/c7cc03572a), 2017-01-01
Supplement: c7cc03572a2.log [file c7cc03572a2.log]

Command:    jaguar run jexec.py -jobname jag_ZrHOFOIV_opt_B3LYP_LACVP_5 -nsubjobs 1 jag_ZrHOFOIV_opt_B3LYP_LACVP_5.in
[running at reduced cpu priority]
Release:    2016-4
Exec:       /opt/schrodinger/suites2016-4/jaguar-v9.4/bin/Darwin-x86_64
Date:       Mon Apr 24 14:26:22 2017

Executing subprocess:
/opt/schrodinger/suites2016-4/jaguar-v9.4/bin/Darwin-x86_64/jexec jag_ZrHOFOIV_opt_B3LYP_LACVP_5.in -cwd -out [user_home_path]/.schrodinger/tmp/jag_ZrHOFOIV_opt_B3LYP_LACVP_5

[running at reduced cpu priority]
Jaguar version 9.4, release  15
Molecular Point Group: C1      
Point Group used: C1
pre (input checking) done.
onee (1-electron integrals) done.
hfig (HF initial guess) done.
probe (project orbitals) done.
grid (grid generation) done.
rwr (Q operators) done.
scf type: DFT=Becke_3_Parameter/HF+Slater+Becke88+VWN+LYP (B3LYP)
  
       i  u  d  i  g
       t  p  i  c  r                                 RMS    maximum
       e  d  i  u  i                       energy  density   DIIS  
       r  t  s  t  d       total energy    change  change    error 
  
etot    1  N  N  5  M   -2456.21743085341           7.2E-03  1.1E-01
etot    2  Y  Y  6  M   -2462.35361538090  6.1E+00  7.2E-03  6.6E-02
etot    3  Y  Y  6  M   -2464.77343660222  2.4E+00  3.5E-03  5.5E-02
etot    4  N  Y  2  U   -2466.11167821522  1.3E+00  2.5E-03  3.6E-02
etot    5  Y  Y  6  M   -2466.25383208182  1.4E-01  9.8E-04  2.5E-02
etot    6  N  Y  2  U   -2466.35251651591  9.9E-02  8.1E-04  4.7E-03
etot    7  Y  Y  6  M   -2466.35518898383  2.7E-03  1.4E-04  5.2E-03
etot    8  Y  Y  6  M   -2466.35803259406  2.8E-03  6.4E-05  2.0E-03
etot    9  N  Y  2  U   -2466.35941709870  1.4E-03  1.9E-05  4.6E-04
etot   10  N  Y  2  U   -2466.35945008405  3.3E-05  6.7E-06  2.2E-04
etot   11  N  Y  2  U   -2466.35945366215  3.6E-06  3.4E-06  6.4E-05
etot   12  N  N  2  U   -2466.35945426248  6.0E-07  0.0E+00  0.0E+00
scf (DFT) done.
der1a (1-e 1st deriv.) done.
rwr (1st deriv. Q) done.
der1b (2-e 1st deriv.) done.
  Geometry optimization step  1
  Total energy:     -2466.35945426248 hartrees
  gradient maximum:        9.3058E-02 .  (  4.5000E-04 )
  gradient rms:            1.5645E-02 .  (  3.0000E-04 )
  displacement maximum:    6.3751E-02 .  (  1.8000E-03 )
  displacement rms:        1.6951E-02 .  (  1.2000E-03 )
  
  predicted energy change: -5.6625E-02
  step size:     0.30085
  trust radius:  0.30000
---------------- geometry iteration   1 complete ----------------
geopt (optimize geometry) done.
onee (1-electron integrals) done.
probe (project orbitals) done.
grid (grid generation) done.
rwr (Q operators) done.
  
       i  u  d  i  g
       t  p  i  c  r                                 RMS    maximum
       e  d  i  u  i                       energy  density   DIIS  
       r  t  s  t  d       total energy    change  change    error 
  
etot    1  N  N  2  U   -2466.35876095406           7.6E-04  8.4E-03
etot    2  Y  Y  6  M   -2466.41114306598  5.2E-02  2.6E-04  3.6E-03
etot    3  N  Y  2  U   -2466.40722219150 -3.9E-03  1.6E-04  7.9E-03
etot    4  Y  Y  6  M   -2466.41442003736  7.2E-03  2.9E-05  6.3E-04
etot    5  N  Y  2  U   -2466.41449536735  7.5E-05  1.3E-05  4.5E-04
etot    6  N  Y  2  U   -2466.41451000787  1.5E-05  5.9E-06  2.8E-04
etot    7  N  Y  2  U   -2466.41451485799  4.9E-06  2.1E-06  5.9E-05
etot    8  N  N  2  U   -2466.41451540805  5.5E-07  0.0E+00  0.0E+00
scf (DFT) done.
der1a (1-e 1st deriv.) done.
rwr (1st deriv. Q) done.
der1b (2-e 1st deriv.) done.
  Geometry optimization step  2
  Total energy:     -2466.41451540805 hartrees
  energy change:          -5.5061E-02 .  (  5.0000E-05 )
  gradient maximum:        2.5034E-02 .  (  4.5000E-04 )
  gradient rms:            6.1476E-03 .  (  3.0000E-04 )
  displacement maximum:    6.5435E-02 .  (  1.8000E-03 )
  displacement rms:        1.6946E-02 .  (  1.2000E-03 )
  
  predicted energy change: -2.0411E-02
  step size:     0.30076
  trust radius:  0.30000
---------------- geometry iteration   2 complete ----------------
geopt (optimize geometry) done.
onee (1-electron integrals) done.
probe (project orbitals) done.
grid (grid generation) done.
rwr (Q operators) done.
  
       i  u  d  i  g
       t  p  i  c  r                                 RMS    maximum
       e  d  i  u  i                       energy  density   DIIS  
       r  t  s  t  d       total energy    change  change    error 
  
etot    1  N  N  2  U   -2466.40168268136           4.9E-04  5.3E-03
etot    2  Y  Y  6  M   -2466.43323210122  3.2E-02  1.5E-04  1.6E-03
etot    3  N  Y  2  U   -2466.43249375075 -7.4E-04  8.5E-05  3.1E-03
etot    4  Y  Y  6  M   -2466.43460725083  2.1E-03  1.7E-05  2.6E-04
etot    5  N  Y  2  U   -2466.43460836660  1.1E-06  8.4E-06  2.4E-04
etot    6  N  Y  2  U   -2466.43461744773  9.1E-06  3.7E-06  1.1E-04
etot    7  N  N  2  U   -2466.43461905106  1.6E-06  0.0E+00  0.0E+00
scf (DFT) done.
der1a (1-e 1st deriv.) done.
rwr (1st deriv. Q) done.
der1b (2-e 1st deriv.) done.
  Geometry optimization step  3
  Total energy:     -2466.43461905106 hartrees
  energy change:          -2.0104E-02 .  (  5.0000E-05 )
  gradient maximum:        5.0180E-02 .  (  4.5000E-04 )
  gradient rms:            6.1623E-03 .  (  3.0000E-04 )
  displacement maximum:    7.3838E-02 .  (  1.8000E-03 )
  displacement rms:        1.6931E-02 .  (  1.2000E-03 )
  
  predicted energy change: -1.0265E-02
  step size:     0.30049
  trust radius:  0.30000
---------------- geometry iteration   3 complete ----------------
geopt (optimize geometry) done.
onee (1-electron integrals) done.
probe (project orbitals) done.
grid (grid generation) done.
rwr (Q operators) done.
  
       i  u  d  i  g
       t  p  i  c  r                                 RMS    maximum
       e  d  i  u  i                       energy  density   DIIS  
       r  t  s  t  d       total energy    change  change    error 
  
etot    1  N  N  2  U   -2466.41261431492           4.3E-04  6.1E-03
etot    2  Y  Y  6  M   -2466.44264079978  3.0E-02  1.6E-04  2.0E-03
etot    3  N  Y  2  U   -2466.44140360008 -1.2E-03  9.5E-05  4.7E-03
etot    4  Y  Y  6  M   -2466.44390922821  2.5E-03  1.6E-05  2.7E-04
etot    5  N  Y  2  U   -2466.44397949372  7.0E-05  7.2E-06  2.7E-04
etot    6  N  Y  2  U   -2466.44398622652  6.7E-06  3.0E-06  1.2E-04
etot    7  N  N  2  U   -2466.44398733695  1.1E-06  0.0E+00  0.0E+00
scf (DFT) done.
der1a (1-e 1st deriv.) done.
rwr (1st deriv. Q) done.
der1b (2-e 1st deriv.) done.
  Geometry optimization step  4
  Total energy:     -2466.44398733695 hartrees
  energy change:          -9.3683E-03 .  (  5.0000E-05 )
  gradient maximum:        2.3384E-02 .  (  4.5000E-04 )
  gradient rms:            2.8935E-03 .  (  3.0000E-04 )
  displacement maximum:    8.4531E-02 .  (  1.8000E-03 )
  displacement rms:        1.6926E-02 .  (  1.2000E-03 )
  
  predicted energy change: -4.8763E-03
  step size:     0.30041
  trust radius:  0.30000
---------------- geometry iteration   4 complete ----------------
geopt (optimize geometry) done.
onee (1-electron integrals) done.
probe (project orbitals) done.
grid (grid generation) done.
rwr (Q operators) done.
  
       i  u  d  i  g
       t  p  i  c  r                                 RMS    maximum
       e  d  i  u  i                       energy  density   DIIS  
       r  t  s  t  d       total energy    change  change    error 
  
etot    1  N  N  2  U   -2466.41901660339           3.7E-04  5.0E-03
etot    2  Y  Y  6  M   -2466.44816026680  2.9E-02  1.1E-04  9.4E-04
etot    3  N  Y  2  U   -2466.44827087945  1.1E-04  5.3E-05  2.6E-03
etot    4  Y  Y  6  M   -2466.44898920082  7.2E-04  1.2E-05  1.5E-04
etot    5  N  Y  2  U   -2466.44898142040 -7.8E-06  5.1E-06  1.2E-04
etot    6  N  Y  2  U   -2466.44898607772  4.7E-06  2.4E-06  9.1E-05
etot    7  N  N  2  U   -2466.44898662493  5.5E-07  0.0E+00  0.0E+00
scf (DFT) done.
der1a (1-e 1st deriv.) done.
rwr (1st deriv. Q) done.
der1b (2-e 1st deriv.) done.
  Geometry optimization step  5
  Total energy:     -2466.44898662493 hartrees
  energy change:          -4.9993E-03 .  (  5.0000E-05 )
  gradient maximum:        6.1198E-03 .  (  4.5000E-04 )
  gradient rms:            1.2985E-03 .  (  3.0000E-04 )
  displacement maximum:    9.5453E-02 .  (  1.8000E-03 )
  displacement rms:        1.6923E-02 .  (  1.2000E-03 )
  
  predicted energy change: -2.9826E-03
  step size:     0.30035
  trust radius:  0.30000
---------------- geometry iteration   5 complete ----------------
geopt (optimize geometry) done.
onee (1-electron integrals) done.
probe (project orbitals) done.
grid (grid generation) done.
rwr (Q operators) done.
  
       i  u  d  i  g
       t  p  i  c  r                                 RMS    maximum
       e  d  i  u  i                       energy  density   DIIS  
       r  t  s  t  d       total energy    change  change    error 
  
etot    1  N  N  2  U   -2466.42898147845           3.3E-04  5.3E-03
etot    2  Y  Y  6  M   -2466.45165287601  2.3E-02  9.1E-05  7.6E-04
etot    3  N  Y  2  U   -2466.45178992727  1.4E-04  4.5E-05  1.8E-03
etot    4  N  Y  2  U   -2466.45227252619  4.8E-04  1.0E-05  1.2E-04
etot    5  N  Y  2  U   -2466.45227584302  3.3E-06  4.4E-06  1.2E-04
etot    6  N  N  2  U   -2466.45227887117  3.0E-06  0.0E+00  0.0E+00
scf (DFT) done.
der1a (1-e 1st deriv.) done.
rwr (1st deriv. Q) done.
der1b (2-e 1st deriv.) done.
  Geometry optimization step  6
  Total energy:     -2466.45227887117 hartrees
  energy change:          -3.2922E-03 .  (  5.0000E-05 )
  gradient maximum:        5.1897E-03 .  (  4.5000E-04 )
  gradient rms:            1.0424E-03 .  (  3.0000E-04 )
  displacement maximum:    8.8598E-02 .  (  1.8000E-03 )
  displacement rms:        1.6926E-02 .  (  1.2000E-03 )
  
  predicted energy change: -2.1883E-03
  step size:     0.30041
  trust radius:  0.30000
---------------- geometry iteration   6 complete ----------------
geopt (optimize geometry) done.
onee (1-electron integrals) done.
probe (project orbitals) done.
grid (grid generation) done.
rwr (Q operators) done.
  
       i  u  d  i  g
       t  p  i  c  r                                 RMS    maximum
       e  d  i  u  i                       energy  density   DIIS  
       r  t  s  t  d       total energy    change  change    error 
  
etot    1  N  N  2  U   -2466.42852071024           3.4E-04  4.9E-03
etot    2  Y  Y  6  M   -2466.45382990309  2.5E-02  8.7E-05  9.3E-04
etot    3  N  Y  2  U   -2466.45416289505  3.3E-04  3.8E-05  1.5E-03
etot    4  N  Y  2  U   -2466.45451147571  3.5E-04  9.4E-06  1.4E-04
etot    5  N  Y  2  U   -2466.45451455697  3.1E-06  4.5E-06  1.4E-04
etot    6  N  N  2  U   -2466.45451757624  3.0E-06  0.0E+00  0.0E+00
scf (DFT) done.
der1a (1-e 1st deriv.) done.
rwr (1st deriv. Q) done.
der1b (2-e 1st deriv.) done.
  Geometry optimization step  7
  Total energy:     -2466.45451757624 hartrees
  energy change:          -2.2387E-03 .  (  5.0000E-05 )
  gradient maximum:        4.4209E-03 .  (  4.5000E-04 )
  gradient rms:            7.5412E-04 .  (  3.0000E-04 )
  displacement maximum:    1.0518E-01 .  (  1.8000E-03 )
  displacement rms:        1.6914E-02 .  (  1.2000E-03 )
  
  predicted energy change: -1.5738E-03
  step size:     0.30020
  trust radius:  0.30000
---------------- geometry iteration   7 complete ----------------
geopt (optimize geometry) done.
onee (1-electron integrals) done.
probe (project orbitals) done.
grid (grid generation) done.
rwr (Q operators) done.
  
       i  u  d  i  g
       t  p  i  c  r                                 RMS    maximum
       e  d  i  u  i                       energy  density   DIIS  
       r  t  s  t  d       total energy    change  change    error 
  
etot    1  N  N  2  U   -2466.43326752370           3.4E-04  5.0E-03
etot    2  Y  Y  6  M   -2466.45548598592  2.2E-02  8.4E-05  9.5E-04
etot    3  N  Y  2  U   -2466.45580979006  3.2E-04  3.7E-05  1.5E-03
etot    4  N  Y  2  U   -2466.45614540537  3.4E-04  9.0E-06  1.0E-04
etot    5  N  Y  2  U   -2466.45614731432  1.9E-06  4.2E-06  1.1E-04
etot    6  N  N  2  U   -2466.45614998999  2.7E-06  0.0E+00  0.0E+00
scf (DFT) done.
der1a (1-e 1st deriv.) done.
rwr (1st deriv. Q) done.
der1b (2-e 1st deriv.) done.
  Geometry optimization step  8
  Total energy:     -2466.45614998999 hartrees
  energy change:          -1.6324E-03 .  (  5.0000E-05 )
  gradient maximum:        6.1509E-03 .  (  4.5000E-04 )
  gradient rms:            7.8538E-04 .  (  3.0000E-04 )
  displacement maximum:    1.0324E-01 .  (  1.8000E-03 )
  displacement rms:        1.6925E-02 .  (  1.2000E-03 )
  
  predicted energy change: -1.3831E-03
  step size:     0.30039
  trust radius:  0.30000
---------------- geometry iteration   8 complete ----------------
geopt (optimize geometry) done.
onee (1-electron integrals) done.
probe (project orbitals) done.
grid (grid generation) done.
rwr (Q operators) done.
  
       i  u  d  i  g
       t  p  i  c  r                                 RMS    maximum
       e  d  i  u  i                       energy  density   DIIS  
       r  t  s  t  d       total energy    change  change    error 
  
etot    1  N  N  2  U   -2466.43710325230           3.3E-04  5.2E-03
etot    2  Y  Y  6  M   -2466.45691283672  2.0E-02  8.6E-05  6.8E-04
etot    3  N  Y  2  U   -2466.45721642606  3.0E-04  4.1E-05  1.4E-03
etot    4  N  Y  2  U   -2466.45758668521  3.7E-04  1.0E-05  1.1E-04
etot    5  N  Y  2  U   -2466.45758959188  2.9E-06  4.6E-06  1.2E-04
etot    6  N  N  2  U   -2466.45759275649  3.2E-06  0.0E+00  0.0E+00
scf (DFT) done.
der1a (1-e 1st deriv.) done.
rwr (1st deriv. Q) done.
der1b (2-e 1st deriv.) done.
  Geometry optimization step  9
  Total energy:     -2466.45759275649 hartrees
  energy change:          -1.4428E-03 .  (  5.0000E-05 )
  gradient maximum:        6.0260E-03 .  (  4.5000E-04 )
  gradient rms:            9.0330E-04 .  (  3.0000E-04 )
  displacement maximum:    9.4538E-02 .  (  1.8000E-03 )
  displacement rms:        1.6903E-02 .  (  1.2000E-03 )
  
  predicted energy change: -1.6155E-03
  step size:     0.30000
  trust radius:  0.30000
---------------- geometry iteration   9 complete ----------------
geopt (optimize geometry) done.
onee (1-electron integrals) done.
probe (project orbitals) done.
grid (grid generation) done.
rwr (Q operators) done.
  
       i  u  d  i  g
       t  p  i  c  r                                 RMS    maximum
       e  d  i  u  i                       energy  density   DIIS  
       r  t  s  t  d       total energy    change  change    error 
  
etot    1  N  N  2  U   -2466.44284797148           3.3E-04  4.5E-03
etot    2  Y  Y  6  M   -2466.45893338318  1.6E-02  9.3E-05  1.1E-03
etot    3  N  Y  2  U   -2466.45905772635  1.2E-04  4.7E-05  2.5E-03
etot    4  N  Y  2  U   -2466.45960235086  5.4E-04  1.2E-05  2.0E-04
etot    5  N  Y  2  U   -2466.45960689311  4.5E-06  5.1E-06  1.5E-04
etot    6  N  Y  2  U   -2466.45961106411  4.2E-06  2.1E-06  5.7E-05
etot    7  N  N  2  U   -2466.45961180791  7.4E-07  0.0E+00  0.0E+00
scf (DFT) done.
der1a (1-e 1st deriv.) done.
rwr (1st deriv. Q) done.
der1b (2-e 1st deriv.) done.
  Geometry optimization step 10
  Total energy:     -2466.45961180791 hartrees
  energy change:          -2.0191E-03 .  (  5.0000E-05 )
  gradient maximum:        7.7122E-03 .  (  4.5000E-04 )
  gradient rms:            1.1580E-03 .  (  3.0000E-04 )
  displacement maximum:    1.0281E-01 .  (  1.8000E-03 )
  displacement rms:        1.6924E-02 .  (  1.2000E-03 )
  
  predicted energy change: -2.5550E-03
  step size:     0.30038
  trust radius:  0.30000
---------------- geometry iteration  10 complete ----------------
geopt (optimize geometry) done.
onee (1-electron integrals) done.
probe (project orbitals) done.
grid (grid generation) done.
rwr (Q operators) done.
  
       i  u  d  i  g
       t  p  i  c  r                                 RMS    maximum
       e  d  i  u  i                       energy  density   DIIS  
       r  t  s  t  d       total energy    change  change    error 
  
etot    1  N  N  2  U   -2466.44413590240           4.1E-04  3.5E-03
etot    2  Y  Y  6  M   -2466.46122233884  1.7E-02  1.4E-04  2.3E-03
etot    3  N  Y  2  U   -2466.46063699628 -5.9E-04  7.7E-05  6.0E-03
etot    4  Y  Y  6  M   -2466.46219960464  1.6E-03  1.7E-05  3.6E-04
etot    5  N  Y  2  U   -2466.46225705134  5.7E-05  6.5E-06  1.8E-04
etot    6  N  Y  2  U   -2466.46226307952  6.0E-06  3.2E-06  7.5E-05
etot    7  N  N  2  U   -2466.46226402109  9.4E-07  0.0E+00  0.0E+00
scf (DFT) done.
der1a (1-e 1st deriv.) done.
rwr (1st deriv. Q) done.
der1b (2-e 1st deriv.) done.
  Geometry optimization step 11
  Total energy:     -2466.46226402109 hartrees
  energy change:          -2.6522E-03 .  (  5.0000E-05 )
  gradient maximum:        1.1433E-02 .  (  4.5000E-04 )
  gradient rms:            1.9511E-03 .  (  3.0000E-04 )
  displacement maximum:    1.0157E-01 .  (  1.8000E-03 )
  displacement rms:        1.6900E-02 .  (  1.2000E-03 )
  
  predicted energy change: -2.2642E-03
  step size:     0.29994
  trust radius:  0.30000
---------------- geometry iteration  11 complete ----------------
geopt (optimize geometry) done.
onee (1-electron integrals) done.
probe (project orbitals) done.
grid (grid generation) done.
rwr (Q operators) done.
  
       i  u  d  i  g
       t  p  i  c  r                                 RMS    maximum
       e  d  i  u  i                       energy  density   DIIS  
       r  t  s  t  d       total energy    change  change    error 
  
etot    1  N  N  2  U   -2466.44385268769           4.5E-04  3.7E-03
etot    2  Y  Y  6  M   -2466.46243552894  1.9E-02  1.8E-04  3.5E-03
etot    3  N  Y  2  U   -2466.46102795804 -1.4E-03  9.9E-05  7.7E-03
etot    4  Y  Y  6  M   -2466.46378042508  2.8E-03  2.0E-05  5.6E-04
etot    5  N  Y  2  U   -2466.46389339642  1.1E-04  7.2E-06  2.5E-04
etot    6  N  Y  2  U   -2466.46389993137  6.5E-06  3.7E-06  9.8E-05
etot    7  N  N  2  U   -2466.46390120417  1.3E-06  0.0E+00  0.0E+00
scf (DFT) done.
der1a (1-e 1st deriv.) done.
rwr (1st deriv. Q) done.
der1b (2-e 1st deriv.) done.
  Geometry optimization step 12
  Total energy:     -2466.46390120417 hartrees
  energy change:          -1.6372E-03 .  (  5.0000E-05 )
  gradient maximum:        1.4976E-02 .  (  4.5000E-04 )
  gradient rms:            2.7510E-03 .  (  3.0000E-04 )
  displacement maximum:    3.8968E-02 .  (  1.8000E-03 )
  displacement rms:        8.3198E-03 .  (  1.2000E-03 )
  
  predicted energy change: -1.3759E-03
  step size:     0.14766
  trust radius:  0.30000
---------------- geometry iteration  12 complete ----------------
geopt (optimize geometry) done.
onee (1-electron integrals) done.
probe (project orbitals) done.
grid (grid generation) done.
rwr (Q operators) done.
  
       i  u  d  i  g
       t  p  i  c  r                                 RMS    maximum
       e  d  i  u  i                       energy  density   DIIS  
       r  t  s  t  d       total energy    change  change    error 
  
etot    1  N  N  2  U   -2466.45932771455           2.1E-04  2.7E-03
etot    2  Y  Y  6  M   -2466.46491886565  5.6E-03  6.0E-05  7.4E-04
etot    3  N  Y  2  U   -2466.46484163807 -7.7E-05  3.1E-05  1.3E-03
etot    4  N  Y  2  U   -2466.46513905250  3.0E-04  6.8E-06  9.1E-05
etot    5  N  Y  2  U   -2466.46514104670  2.0E-06  3.0E-06  9.8E-05
etot    6  N  N  2  U   -2466.46514232071  1.3E-06  0.0E+00  0.0E+00
scf (DFT) done.
der1a (1-e 1st deriv.) done.
rwr (1st deriv. Q) done.
der1b (2-e 1st deriv.) done.
  Geometry optimization step 13
  Total energy:     -2466.46514232071 hartrees
  energy change:          -1.2411E-03 .  (  5.0000E-05 )
  gradient maximum:        9.9908E-03 .  (  4.5000E-04 )
  gradient rms:            1.6690E-03 .  (  3.0000E-04 )
  displacement maximum:    1.1656E-01 .  (  1.8000E-03 )
  displacement rms:        1.6903E-02 .  (  1.2000E-03 )
  
  predicted energy change: -2.8857E-03
  step size:     0.29999
  trust radius:  0.30000
---------------- geometry iteration  13 complete ----------------
geopt (optimize geometry) done.
onee (1-electron integrals) done.
probe (project orbitals) done.
grid (grid generation) done.
rwr (Q operators) done.
  
       i  u  d  i  g
       t  p  i  c  r                                 RMS    maximum
       e  d  i  u  i                       energy  density   DIIS  
       r  t  s  t  d       total energy    change  change    error 
  
etot    1  N  N  2  U   -2466.43876953770           3.9E-04  5.0E-03
etot    2  Y  Y  6  M   -2466.46456905861  2.6E-02  1.5E-04  1.8E-03
etot    3  N  Y  2  U   -2466.46375692163 -8.1E-04  8.2E-05  3.6E-03
etot    4  Y  Y  6  M   -2466.46561010035  1.9E-03  1.8E-05  3.7E-04
etot    5  N  Y  2  U   -2466.46565944856  4.9E-05  6.2E-06  1.6E-04
etot    6  N  Y  2  U   -2466.46566458932  5.1E-06  3.2E-06  1.2E-04
etot    7  N  N  2  U   -2466.46566594312  1.4E-06  0.0E+00  0.0E+00
scf (DFT) done.
der1a (1-e 1st deriv.) done.
rwr (1st deriv. Q) done.
der1b (2-e 1st deriv.) done.
  Geometry optimization step 14
  Total energy:     -2466.46566594312 hartrees
  energy change:          -5.2362E-04 .  (  5.0000E-05 )
  gradient maximum:        1.4008E-02 .  (  4.5000E-04 )
  gradient rms:            2.6720E-03 .  (  3.0000E-04 )
  displacement maximum:    8.6711E-02 .  (  1.8000E-03 )
  displacement rms:        1.2393E-02 .  (  1.2000E-03 )
  
  predicted energy change: -1.8422E-03
  step size:     0.21995
  trust radius:  0.30000
---------------- geometry iteration  14 complete ----------------
geopt (optimize geometry) done.
onee (1-electron integrals) done.
probe (project orbitals) done.
grid (grid generation) done.
rwr (Q operators) done.
  
       i  u  d  i  g
       t  p  i  c  r                                 RMS    maximum
       e  d  i  u  i                       energy  density   DIIS  
       r  t  s  t  d       total energy    change  change    error 
  
etot    1  N  N  2  U   -2466.45422288733           3.2E-04  3.6E-03
etot    2  Y  Y  6  M   -2466.46677241078  1.3E-02  1.1E-04  1.8E-03
etot    3  N  Y  2  U   -2466.46623022618 -5.4E-04  6.3E-05  4.6E-03
etot    4  Y  Y  6  M   -2466.46732744020  1.1E-03  1.3E-05  2.9E-04
etot    5  N  Y  2  U   -2466.46739120768  6.4E-05  5.0E-06  1.4E-04
etot    6  N  N  2  U   -2466.46739468352  3.5E-06  0.0E+00  0.0E+00
scf (DFT) done.
der1a (1-e 1st deriv.) done.
rwr (1st deriv. Q) done.
der1b (2-e 1st deriv.) done.
  Geometry optimization step 15
  Total energy:     -2466.46739468352 hartrees
  energy change:          -1.7287E-03 .  (  5.0000E-05 )
  gradient maximum:        3.4705E-03 .  (  4.5000E-04 )
  gradient rms:            7.9055E-04 .  (  3.0000E-04 )
  displacement maximum:    4.0880E-02 .  (  1.8000E-03 )
  displacement rms:        7.9874E-03 .  (  1.2000E-03 )
  
  predicted energy change: -4.1019E-04
  step size:     0.14176
  trust radius:  0.30000
---------------- geometry iteration  15 complete ----------------
geopt (optimize geometry) done.
onee (1-electron integrals) done.
probe (project orbitals) done.
grid (grid generation) done.
rwr (Q operators) done.
  
       i  u  d  i  g
       t  p  i  c  r                                 RMS    maximum
       e  d  i  u  i                       energy  density   DIIS  
       r  t  s  t  d       total energy    change  change    error 
  
etot    1  N  N  2  U   -2466.46170131810           2.0E-04  2.7E-03
etot    2  Y  Y  6  M   -2466.46752145717  5.8E-03  7.2E-05  1.4E-03
etot    3  N  Y  2  U   -2466.46727966558 -2.4E-04  4.0E-05  3.5E-03
etot    4  N  Y  2  U   -2466.46774670298  4.7E-04  8.9E-06  2.2E-04
etot    5  N  Y  2  U   -2466.46775172738  5.0E-06  2.8E-06  7.1E-05
etot    6  N  N  2  U   -2466.46775268218  9.5E-07  0.0E+00  0.0E+00
scf (DFT) done.
der1a (1-e 1st deriv.) done.
rwr (1st deriv. Q) done.
der1b (2-e 1st deriv.) done.
  Geometry optimization step 16
  Total energy:     -2466.46775268218 hartrees
  energy change:          -3.5800E-04 .  (  5.0000E-05 )
  gradient maximum:        2.9591E-03 .  (  4.5000E-04 )
  gradient rms:            5.8120E-04 .  (  3.0000E-04 )
  displacement maximum:    2.8946E-02 .  (  1.8000E-03 )
  displacement rms:        5.0790E-03 .  (  1.2000E-03 )
  
  predicted energy change: -1.5944E-04
  step size:     0.09014
  trust radius:  0.30000
---------------- geometry iteration  16 complete ----------------
geopt (optimize geometry) done.
onee (1-electron integrals) done.
probe (project orbitals) done.
grid (grid generation) done.
rwr (Q operators) done.
  
       i  u  d  i  g
       t  p  i  c  r                                 RMS    maximum
       e  d  i  u  i                       energy  density   DIIS  
       r  t  s  t  d       total energy    change  change    error 
  
etot    1  N  N  2  U   -2466.46639930892           9.2E-05  2.1E-03
etot    2  Y  Y  6  M   -2466.46790994750  1.5E-03  2.9E-05  4.1E-04
etot    3  N  Y  2  U   -2466.46790467095 -5.3E-06  1.4E-05  8.0E-04
etot    4  N  Y  2  U   -2466.46796165421  5.7E-05  3.5E-06  4.8E-05
etot    5  N  N  2  U   -2466.46796242335  7.7E-07  0.0E+00  0.0E+00
scf (DFT) done.
der1a (1-e 1st deriv.) done.
rwr (1st deriv. Q) done.
der1b (2-e 1st deriv.) done.
  Geometry optimization step 17
  Total energy:     -2466.46796242335 hartrees
  energy change:          -2.0974E-04 .  (  5.0000E-05 )
  gradient maximum:        2.4850E-03 .  (  4.5000E-04 )
  gradient rms:            4.5483E-04 .  (  3.0000E-04 )
  displacement maximum:    4.9211E-02 .  (  1.8000E-03 )
  displacement rms:        8.0037E-03 .  (  1.2000E-03 )
  
  predicted energy change: -1.7430E-04
  step size:     0.14205
  trust radius:  0.30000
---------------- geometry iteration  17 complete ----------------
geopt (optimize geometry) done.
onee (1-electron integrals) done.
probe (project orbitals) done.
grid (grid generation) done.
rwr (Q operators) done.
  
       i  u  d  i  g
       t  p  i  c  r                                 RMS    maximum
       e  d  i  u  i                       energy  density   DIIS  
       r  t  s  t  d       total energy    change  change    error 
  
etot    1  N  N  2  U   -2466.46192659391           1.8E-04  4.8E-03
etot    2  Y  Y  6  M   -2466.46794466420  6.0E-03  6.2E-05  9.8E-04
etot    3  N  Y  2  U   -2466.46786932871 -7.5E-05  3.4E-05  2.5E-03
etot    4  N  Y  2  U   -2466.46818591481  3.2E-04  6.8E-06  1.6E-04
etot    5  N  Y  2  U   -2466.46818829533  2.4E-06  2.5E-06  1.0E-04
etot    6  N  N  2  U   -2466.46818915506  8.6E-07  0.0E+00  0.0E+00
scf (DFT) done.
der1a (1-e 1st deriv.) done.
rwr (1st deriv. Q) done.
der1b (2-e 1st deriv.) done.
  Geometry optimization step 18
  Total energy:     -2466.46818915506 hartrees
  energy change:          -2.2673E-04 .  (  5.0000E-05 )
  gradient maximum:        3.0693E-03 .  (  4.5000E-04 )
  gradient rms:            5.0065E-04 .  (  3.0000E-04 )
  displacement maximum:    2.9702E-02 .  (  1.8000E-03 )
  displacement rms:        4.7542E-03 .  (  1.2000E-03 )
  
  predicted energy change: -8.8836E-05
  step size:     0.08438
  trust radius:  0.30000
---------------- geometry iteration  18 complete ----------------
geopt (optimize geometry) done.
onee (1-electron integrals) done.
probe (project orbitals) done.
grid (grid generation) done.
rwr (Q operators) done.
  
       i  u  d  i  g
       t  p  i  c  r                                 RMS    maximum
       e  d  i  u  i                       energy  density   DIIS  
       r  t  s  t  d       total energy    change  change    error 
  
etot    1  N  N  2  U   -2466.46696422217           8.5E-05  1.5E-03
etot    2  Y  Y  6  M   -2466.46824207265  1.3E-03  2.1E-05  2.5E-04
etot    3  N  Y  2  U   -2466.46826877096  2.7E-05  8.9E-06  3.6E-04
etot    4  N  Y  2  U   -2466.46828595153  1.7E-05  2.5E-06  3.2E-05
etot    5  N  N  2  U   -2466.46828616065  2.1E-07  0.0E+00  0.0E+00
scf (DFT) done.
der1a (1-e 1st deriv.) done.
rwr (1st deriv. Q) done.
der1b (2-e 1st deriv.) done.
  Geometry optimization step 19
  Total energy:     -2466.46828616065 hartrees
  energy change:          -9.7006E-05 .  (  5.0000E-05 )
  gradient maximum:        1.8296E-03 .  (  4.5000E-04 )
  gradient rms:            2.8715E-04 *  (  3.0000E-04 )
  displacement maximum:    2.0186E-02 .  (  1.8000E-03 )
  displacement rms:        3.1621E-03 .  (  1.2000E-03 )
  
  predicted energy change: -4.4909E-05
  step size:     0.05612
  trust radius:  0.30000
---------------- geometry iteration  19 complete ----------------
geopt (optimize geometry) done.
onee (1-electron integrals) done.
probe (project orbitals) done.
grid (grid generation) done.
rwr (Q operators) done.
  
       i  u  d  i  g
       t  p  i  c  r                                 RMS    maximum
       e  d  i  u  i                       energy  density   DIIS  
       r  t  s  t  d       total energy    change  change    error 
  
etot    1  N  N  2  U   -2466.46737571242           7.0E-05  1.2E-03
etot    2  Y  Y  6  M   -2466.46830775810  9.3E-04  1.9E-05  2.4E-04
etot    3  N  Y  2  U   -2466.46832091874  1.3E-05  9.7E-06  4.4E-04
etot    4  N  Y  2  U   -2466.46834176996  2.1E-05  1.9E-06  2.0E-05
etot    5  N  N  2  U   -2466.46834190307  1.3E-07  0.0E+00  0.0E+00
scf (DFT) done.
der1a (1-e 1st deriv.) done.
rwr (1st deriv. Q) done.
der1b (2-e 1st deriv.) done.
  Geometry optimization step 20
  Total energy:     -2466.46834190307 hartrees
  energy change:          -5.5742E-05 .  (  5.0000E-05 )
  gradient maximum:        1.5126E-03 .  (  4.5000E-04 )
  gradient rms:            2.2875E-04 *  (  3.0000E-04 )
  displacement maximum:    3.1079E-02 .  (  1.8000E-03 )
  displacement rms:        4.7268E-03 .  (  1.2000E-03 )
  
  predicted energy change: -4.4829E-05
  step size:     0.08389
  trust radius:  0.30000
---------------- geometry iteration  20 complete ----------------
geopt (optimize geometry) done.
onee (1-electron integrals) done.
probe (project orbitals) done.
grid (grid generation) done.
rwr (Q operators) done.
  
       i  u  d  i  g
       t  p  i  c  r                                 RMS    maximum
       e  d  i  u  i                       energy  density   DIIS  
       r  t  s  t  d       total energy    change  change    error 
  
etot    1  N  N  2  U   -2466.46637977549           1.0E-04  1.8E-03
etot    2  Y  Y  6  M   -2466.46832916711  1.9E-03  2.3E-05  3.5E-04
etot    3  N  Y  2  U   -2466.46837544276  4.6E-05  9.6E-06  3.6E-04
etot    4  N  Y  2  U   -2466.46839226259  1.7E-05  3.0E-06  7.1E-05
etot    5  N  N  2  U   -2466.46839266586  4.0E-07  0.0E+00  0.0E+00
scf (DFT) done.
der1a (1-e 1st deriv.) done.
rwr (1st deriv. Q) done.
der1b (2-e 1st deriv.) done.
  Geometry optimization step 21
  Total energy:     -2466.46839266586 hartrees
  energy change:          -5.0763E-05 .  (  5.0000E-05 )
  gradient maximum:        1.3445E-03 .  (  4.5000E-04 )
  gradient rms:            2.0252E-04 *  (  3.0000E-04 )
  displacement maximum:    1.3659E-02 .  (  1.8000E-03 )
  displacement rms:        2.1747E-03 .  (  1.2000E-03 )
  
  predicted energy change: -1.5886E-05
  step size:     0.03860
  trust radius:  0.30000
---------------- geometry iteration  21 complete ----------------
geopt (optimize geometry) done.
onee (1-electron integrals) done.
probe (project orbitals) done.
grid (grid generation) done.
rwr (Q operators) done.
  
       i  u  d  i  g
       t  p  i  c  r                                 RMS    maximum
       e  d  i  u  i                       energy  density   DIIS  
       r  t  s  t  d       total energy    change  change    error 
  
etot    1  N  N  2  U   -2466.46797999242           4.8E-05  7.3E-04
etot    2  N  Y  2  U   -2466.46839572578  4.2E-04  1.2E-05  1.6E-04
etot    3  N  Y  2  U   -2466.46840108602  5.4E-06  5.4E-06  2.4E-04
etot    4  N  Y  2  U   -2466.46840800373  6.9E-06  1.3E-06  2.5E-05
etot    5  N  N  2  U   -2466.46840811570  1.1E-07  0.0E+00  0.0E+00
scf (DFT) done.
der1a (1-e 1st deriv.) done.
rwr (1st deriv. Q) done.
der1b (2-e 1st deriv.) done.
  Geometry optimization step 22
  Total energy:     -2466.46840811570 hartrees
  energy change:          -1.5450E-05 *  (  5.0000E-05 )
  gradient maximum:        9.3430E-04 .  (  4.5000E-04 )
  gradient rms:            1.5370E-04 *  (  3.0000E-04 )
  displacement maximum:    1.1173E-02 .  (  1.8000E-03 )
  displacement rms:        1.7030E-03 .  (  1.2000E-03 )
  
  predicted energy change: -1.0492E-05
  step size:     0.03023
  trust radius:  0.30000
---------------- geometry iteration  22 complete ----------------
geopt (optimize geometry) done.
onee (1-electron integrals) done.
probe (project orbitals) done.
grid (grid generation) done.
rwr (Q operators) done.
  
       i  u  d  i  g
       t  p  i  c  r                                 RMS    maximum
       e  d  i  u  i                       energy  density   DIIS  
       r  t  s  t  d       total energy    change  change    error 
  
etot    1  N  N  2  U   -2466.46804038180           4.4E-05  8.1E-04
etot    2  N  Y  2  U   -2466.46841824476  3.8E-04  1.1E-05  1.5E-04
etot    3  N  Y  2  U   -2466.46842486032  6.6E-06  4.5E-06  1.6E-04
etot    4  N  N  2  U   -2466.46842878250  3.9E-06  0.0E+00  0.0E+00
scf (DFT) done.
der1a (1-e 1st deriv.) done.
rwr (1st deriv. Q) done.
der1b (2-e 1st deriv.) done.
  Geometry optimization step 23
  Total energy:     -2466.46842878250 hartrees
  energy change:          -2.0667E-05 *  (  5.0000E-05 )
  gradient maximum:        7.2183E-04 .  (  4.5000E-04 )
  gradient rms:            1.2238E-04 *  (  3.0000E-04 )
  displacement maximum:    6.7203E-03 .  (  1.8000E-03 )
  displacement rms:        1.1196E-03 *  (  1.2000E-03 )
  
  predicted energy change: -6.8216E-06
  step size:     0.01987
  trust radius:  0.30000
---------------- geometry iteration  23 complete ----------------
geopt (optimize geometry) done.
onee (1-electron integrals) done.
probe (project orbitals) done.
grid (grid generation) done.
rwr (Q operators) done.
  
       i  u  d  i  g
       t  p  i  c  r                                 RMS    maximum
       e  d  i  u  i                       energy  density   DIIS  
       r  t  s  t  d       total energy    change  change    error 
  
etot    1  N  N  2  U   -2466.46833934639           2.5E-05  2.9E-04
etot    2  N  Y  2  U   -2466.46843918419  1.0E-04  8.3E-06  1.1E-04
etot    3  N  Y  2  U   -2466.46843765043 -1.5E-06  4.5E-06  2.8E-04
etot    4  N  N  2  U   -2466.46844339950  5.7E-06  0.0E+00  0.0E+00
scf (DFT) done.
der1a (1-e 1st deriv.) done.
rwr (1st deriv. Q) done.
der1b (2-e 1st deriv.) done.
  Geometry optimization step 24
  Total energy:     -2466.46844339950 hartrees
  energy change:          -1.4617E-05 *  (  5.0000E-05 )
  gradient maximum:        5.5325E-04 .  (  4.5000E-04 )
  gradient rms:            9.0127E-05 *  (  3.0000E-04 )
  displacement maximum:    1.6027E-02 .  (  1.8000E-03 )
  displacement rms:        2.0268E-03 .  (  1.2000E-03 )
  
  predicted energy change: -6.2878E-06
  step size:     0.03597
  trust radius:  0.30000
---------------- geometry iteration  24 complete ----------------
geopt (optimize geometry) done.
onee (1-electron integrals) done.
probe (project orbitals) done.
grid (grid generation) done.
rwr (Q operators) done.
  
       i  u  d  i  g
       t  p  i  c  r                                 RMS    maximum
       e  d  i  u  i                       energy  density   DIIS  
       r  t  s  t  d       total energy    change  change    error 
  
etot    1  N  N  2  U   -2466.46795673641           5.0E-05  1.1E-03
etot    2  N  Y  2  U   -2466.46841468232  4.6E-04  1.3E-05  2.0E-04
etot    3  N  Y  2  U   -2466.46842202422  7.3E-06  5.7E-06  3.0E-04
etot    4  N  Y  2  U   -2466.46842893020  6.9E-06  1.4E-06  2.4E-05
etot    5  N  N  2  U   -2466.46842899152  6.1E-08  0.0E+00  0.0E+00
scf (DFT) done.
der1a (1-e 1st deriv.) done.
rwr (1st deriv. Q) done.
der1b (2-e 1st deriv.) done.
  Geometry optimization step 25
  Total energy:     -2466.46842899152 hartrees
  energy change:           1.4408E-05 *  (  5.0000E-05 )
  gradient maximum:        6.3081E-04 .  (  4.5000E-04 )
  gradient rms:            1.0585E-04 *  (  3.0000E-04 )
  displacement maximum:    9.4741E-03 .  (  1.8000E-03 )
  displacement rms:        1.4024E-03 .  (  1.2000E-03 )
  
  predicted energy change: -5.5932E-06
  step size:     0.02489
  trust radius:  0.30000
---------------- geometry iteration  25 complete ----------------
geopt (optimize geometry) done.
onee (1-electron integrals) done.
probe (project orbitals) done.
grid (grid generation) done.
rwr (Q operators) done.
  
       i  u  d  i  g
       t  p  i  c  r                                 RMS    maximum
       e  d  i  u  i                       energy  density   DIIS  
       r  t  s  t  d       total energy    change  change    error 
  
etot    1  N  N  2  U   -2466.46822409090           3.4E-05  5.3E-04
etot    2  N  Y  2  U   -2466.46842550017  2.0E-04  8.6E-06  9.7E-05
etot    3  N  Y  2  U   -2466.46842724937  1.7E-06  4.2E-06  2.2E-04
etot    4  N  N  2  U   -2466.46843108039  3.8E-06  0.0E+00  0.0E+00
scf (DFT) done.
der1a (1-e 1st deriv.) done.
rwr (1st deriv. Q) done.
der1b (2-e 1st deriv.) done.
  Geometry optimization step 26
  Total energy:     -2466.46843108039 hartrees
  energy change:          -2.0889E-06 #  (  5.0000E-05 )
  gradient maximum:        6.0837E-04 .  (  4.5000E-04 )
  gradient rms:            8.6272E-05 *  (  3.0000E-04 )
  displacement maximum:    5.1014E-03 .  (  1.8000E-03 )
  displacement rms:        8.6849E-04 *  (  1.2000E-03 )
  
  predicted energy change: -3.4538E-06
  step size:     0.01541
  trust radius:  0.30000
---------------- geometry iteration  26 complete ----------------
geopt (optimize geometry) done.
onee (1-electron integrals) done.
probe (project orbitals) done.
grid (grid generation) done.
rwr (Q operators) done.
  
       i  u  d  i  g
       t  p  i  c  r                                 RMS    maximum
       e  d  i  u  i                       energy  density   DIIS  
       r  t  s  t  d       total energy    change  change    error 
  
etot    1  N  N  2  U   -2466.46835557580           2.3E-05  3.0E-04
etot    2  N  Y  2  U   -2466.46844325656  8.8E-05  6.6E-06  7.2E-05
etot    3  N  Y  2  U   -2466.46844248530 -7.7E-07  3.6E-06  2.0E-04
etot    4  N  N  2  U   -2466.46844602584  3.5E-06  0.0E+00  0.0E+00
scf (DFT) done.
der1a (1-e 1st deriv.) done.
rwr (1st deriv. Q) done.
der1b (2-e 1st deriv.) done.
  Geometry optimization step 27
  Total energy:     -2466.46844602584 hartrees
  energy change:          -1.4945E-05 *  (  5.0000E-05 )
  gradient maximum:        4.1150E-04 *  (  4.5000E-04 )
  gradient rms:            7.6651E-05 *  (  3.0000E-04 )
  displacement maximum:    4.5932E-03 .  (  1.8000E-03 )
  displacement rms:        7.1829E-04 *  (  1.2000E-03 )
  
  predicted energy change: -3.1491E-06
  step size:     0.01275
  trust radius:  0.30000
---------------- geometry iteration  27 complete ----------------
geopt (optimize geometry) done.
onee (1-electron integrals) done.
probe (project orbitals) done.
grid (grid generation) done.
rwr (Q operators) done.
  
       i  u  d  i  g
       t  p  i  c  r                                 RMS    maximum
       e  d  i  u  i                       energy  density   DIIS  
       r  t  s  t  d       total energy    change  change    error 
  
etot    1  N  N  2  U   -2466.46838141876           2.0E-05  4.5E-04
etot    2  N  Y  2  U   -2466.46845088122  6.9E-05  5.2E-06  9.2E-05
etot    3  N  Y  2  U   -2466.46845134862  4.7E-07  2.6E-06  1.5E-04
etot    4  N  N  2  U   -2466.46845304069  1.7E-06  0.0E+00  0.0E+00
scf (DFT) done.
der1a (1-e 1st deriv.) done.
rwr (1st deriv. Q) done.
der1b (2-e 1st deriv.) done.
  Geometry optimization step 28
  Total energy:     -2466.46845304069 hartrees
  energy change:          -7.0148E-06 *  (  5.0000E-05 )
  gradient maximum:        3.6263E-04 *  (  4.5000E-04 )
  gradient rms:            5.6908E-05 #  (  3.0000E-04 )
  displacement maximum:    4.6315E-03 .  (  1.8000E-03 )
  displacement rms:        6.6930E-04 *  (  1.2000E-03 )
  
  predicted energy change: -2.0404E-06
  step size:     0.01188
  trust radius:  0.30000
------------- final geometry iteration  28 complete -------------
geopt (optimize geometry) done.
Job jag_ZrHOFOIV_opt_B3LYP_LACVP_5 completed on [hostname] at Mon Apr 24 19:59:43 2017
Timer (jaguar_backend.py) : 20000.85 secs (5 hrs, 33 mins, 20 secs)
Finished:   Mon Apr 24 19:59:43 2017
